# Supplementary material for: Physical activity and risk of infection, severity and mortality of COVID-19: a systematic review and non-linear dose–response meta-analysis of data from 1 853 610 adults
Source: HighWire-hosted journal article supplement (doi:10.1136/bjsports-2022-105733), 2022-08-22
Supplement: bjsports-2022-105733supp001_data_supplement.pdf [file bjsports-2022-105733supp001_data_supplement.pdf]

### Electronic supplementary material

#### **Physical activity and risk of infection, severity and mortality of COVID-19: a systematic review and nonlinear dose–response meta-analysis of data from 1,853,610 adults**

**Online supplemental emethod 1.** Electronic search strategy.

**Online supplemental emethod 2.** Excluded studies and reasons for exclusion.

**Online supplemental eTable 1.** Characteristics of the studies

**Online supplemental eTable 2.** Results of the NIH Quality Assessment Tool for Observational Cohort and Cross-Sectional Studies and the Quality Assessment of Case-Control Studies.

**Online supplemental eTable 3.** Grading of Recommendations Assessment, Development and Evaluation (GRADE) assessment of overall quality of evidence.

**Online supplemental eFigure 1.** Doi plot for hospitalization. Relative Risk was transferred to natural logarithm form.

**Online supplemental eFigure 2.** Doi plot for COVID-19 infection. Relative Risk was transferred to natural logarithm form.

**Online supplemental eFigure 3.** Doi plot for severe COVID-19 illness. Relative Risk was transferred to natural logarithm form.

**Online supplemental eFigure 4.** Doi plot for death due to COVID-19. Relative Risk was transferred to natural logarithm form.

**Online supplemental eFigure 5.** Sensitivity analyses once each study was excluded for COVID-19 infection.

**Online supplemental eFigure 6.** Sensitivity analyses once each study was excluded for hospitalization due to COVID-19.

**Online supplemental eFigure 7.** Sensitivity analyses once each study was excluded for severe COVID-19 illness.

**Online supplemental eFigure 8.** Sensitivity analyses once each study was excluded for death due to COVID-19.

**Online supplemental eTable 4.** Subgroup analysis according to design, physical activity assessment, and measure outcome.

**Online supplemental emethod 1. Electronic search strategy.***PubMed*

#1 ("COVID-19" OR "COVID-19"[MeSH Terms] OR "COVID-19 Vaccines" OR "COVID-19 Vaccines"[MeSH Terms] OR "COVID-19 serotherapy" OR "COVID-19 serotherapy"[Supplementary Concept] OR "COVID-19 Nucleic Acid Testing" OR "covid-19 nucleic acid testing"[MeSH Terms] OR "COVID-19 Serological Testing" OR "covid-19 serological testing"[MeSH Terms] OR "COVID-19 Testing" OR "covid-19 testing"[MeSH Terms] OR "SARS-CoV-2" OR "sars-cov-2"[MeSH Terms] OR "Severe Acute Respiratory Syndrome Coronavirus 2" OR "NCOV" OR "2019 NCOV" OR ("coronavirus"[MeSH Terms] OR "coronavirus" OR "COV") AND 2019/11/01[PDAT] : 3000/12/31[PDAT]))

#2 "exercise"[MeSH Terms] OR "exercise"[All Fields] OR ("physical"[All Fields] AND "activity"[All Fields]) OR "physical activity"[All Fields] OR ("exercise"[MeSH Terms] OR "exercise"[All Fields] OR "exercises"[All Fields] OR "exercise therapy"[MeSH Terms] OR ("exercise"[All Fields] AND "therapy"[All Fields]) OR "exercise therapy"[All Fields] OR "exercise s"[All Fields] OR "exercised"[All Fields] OR "exerciser"[All Fields] OR "exercisers"[All Fields] OR "exercising"[All Fields]) OR ("life style"[MeSH Terms] OR ("life"[All Fields] AND "style"[All Fields]) OR "life style"[All Fields] OR "lifestyle"[All Fields] OR "lifestyles"[All Fields]) OR ("sedentary behavior"[MeSH Terms] OR ("sedentary"[All Fields] AND "behavior"[All Fields]) OR "sedentary behavior"[All Fields] OR ("physical"[All Fields] AND "inactivity"[All Fields]) OR "physical inactivity"[All Fields])

#3 #1 AND #2

#4 "mortality"[MeSH Terms] OR "mortality"[All Fields] OR "mortalities"[All Fields] OR "mortality"[MeSH Subheading] OR "death"[MeSH Terms] OR "death"[All Fields] OR "deaths"[All Fields] OR "covid 19"[MeSH Terms] OR "covid 19"[All Fields] OR "covid 19 infection"[All Fields] OR "hospital s"[All Fields] OR "hospitalisation"[All Fields] OR "hospitalization"[MeSH Terms] OR "hospitalization"[All Fields] OR "hospitalising"[All Fields] OR "hospitality"[All Fields] OR "hospitalisations"[All Fields] OR "hospitalised"[All Fields] OR "hospitalizations"[All Fields] OR "hospitalized"[All Fields] OR "hospitalize"[All Fields] OR "hospitalizing"[All Fields] OR "hospitals"[MeSH Terms] OR "hospitals"[All Fields] OR "hospital"[All Fields] OR "sever"[All Fields] OR "severe"[All Fields] OR "severed"[All Fields] OR "severely"[All Fields] OR "severer"[All Fields] OR "severes"[All Fields] OR "severing"[All Fields] OR "severities"[All Fields] OR "severity"[All Fields] OR "severs"[All Fields]

#5 #4 AND #3

*Web of Science*

#1 TOPIC: ("COVID-19" OR "SARS-CoV-2" OR "severe acute respiratory syndrome coronavirus 2" OR "coronavirus")

#2 TOPIC: ("physical activity" OR "exercise" OR "lifestyle" OR "physical inactivity")

#3 #2 AND #1

#4 TOPIC: ("mortality" OR "death" OR "hospitalization" OR "hospitalisation", "infection" OR "severe COVID-19")

#5 #4 AND #3

### *SportsDiscus*

S1 (MH "COVID-19") OR (MH "SARS-CoV-2") OR (MH "severe acute respiratory syndrome coronavirus 2") OR (MH "coronavirus")

S2 (MH "physical activity") OR 'exercise OR 'lifestyle' OR 'physical inactivity'

S3 ((MH "physical activity") OR 'exercise OR 'lifestyle' OR 'physical inactivity') AND (S1 AND S2)

S4 (MH "mortality") OR 'death' OR 'hospitalization' OR 'hospitalisation' OR 'infection' OR 'severe COVID-19'

S5 S4 AND S3

**Online supplemental emethod 2.** Excluded studies and reasons for exclusion.*Did not include physical activity data:*

Af Geijerstam A, Mehlig K, Börjesson M, et al (2021) Fitness, strength and severity of COVID-19: A prospective register study of 1 559 187 Swedish conscripts. *BMJ Open* 11(7):1–8. <https://doi.org/10.1136/bmjopen-2021-051316>

Brandenburg JP, Lesser IA, Thomson CJ, Giles L V. (2021) Does higher self-reported cardiorespiratory fitness reduce the odds of hospitalization from COVID-19? *J Phys Act Heal* 18(7):782–788. <https://doi.org/10.1123/jpah.2020-0817>

Christensen RAG, Arneja J, Cyr KS, Sturrock SL, Brooks JD (2021) The association of estimated cardiorespiratory fitness with COVID-19 incidence and mortality: A cohort study. *PLoS One* 16(5 May):1–10. <https://doi.org/10.1371/journal.pone.0250508>

Maltagliati S, Sieber S, Sarrazin P, et al (2021) Muscle strength explains the protective effect of physical activity against COVID-19 hospitalization among adults aged 50 years and older. *J Sports Sci* 39(24):2796–2803. <https://doi.org/10.1080/02640414.2021.1964721>

*Data from hospitalised patients:*

Pinto AJ, Goessler KF, Fernandes AL, et al (2021) No independent associations between physical activity and clinical outcomes among hospitalized patients with moderate to severe COVID-19. *J Sport Heal Sci* 10(6):690–696. <https://doi.org/10.1016/j.jshs.2021.08.001>

Salgado-Aranda R, Pérez-Castellano N, Núñez-Gil I, et al (2021) Influence of Baseline Physical Activity as a Modifying Factor on COVID-19 Mortality: A Single-Center, Retrospective Study. *Infect Dis Ther* 10(2):801–814. <https://doi.org/10.1007/s40121-021-00418-6>

*Data from the same study:*

Rowlands A V., Kloecker DE, Chudasama Y, et al (2021) Association of Timing and Balance of Physical Activity and Rest/Sleep With Risk of COVID-19: A UK Biobank Study. *Mayo Clin Proc* 96(1):156–164. <https://doi.org/10.1016/j.mayocp.2020.10.032>

Hamrouni M, Roberts MJ, Thackray A, et al. Associations of obesity, physical activity level, inflammation and cardiometabolic health with COVID-19 mortality: A prospective analysis of the UK Biobank cohort. *BMJ Open* 2021;11:1–9. doi:10.1136/bmjopen-2021-055003

*Did not meet with the design or statistical analysis criteria:*

Cunningham GB (2021) Physical activity and its relationship with COVID-19 cases and deaths: Analysis of U.S. counties. *J Sport Heal Sci* 10(5):570–576. <https://doi.org/10.1016/j.jshs.2021.03.008>

Wang J, Sato T, Sakuraba A (2021) Worldwide association of lifestyle-related factors and COVID-19 mortality. *Ann Med* 53(1):1531–1536.  
<https://doi.org/10.1080/07853890.2021.1968029>

Online supplemental eTable 1. Characteristics of the studies.

| Author, year Location                    | Study design             | Source of information                      | Study period              | Follow-up (years) | N (% females) / Age (years) | PA assessment                                                                           | Outcome                             | Events                                                                   | Covariates                                                                                                                                                                                                                                                                                                                                                | Measure of association |
|------------------------------------------|--------------------------|--------------------------------------------|---------------------------|-------------------|-----------------------------|-----------------------------------------------------------------------------------------|-------------------------------------|--------------------------------------------------------------------------|-----------------------------------------------------------------------------------------------------------------------------------------------------------------------------------------------------------------------------------------------------------------------------------------------------------------------------------------------------------|------------------------|
| Ahmadi et al. (2021) [40]<br>UK          | Prospective cohort study | UK Biobank                                 | [2006-2010] and 2021      | 11.3              | 468,569 (54.6%) / 56.5      | IPAQ short form                                                                         | Mortality                           | Deaths (n=387)                                                           | Age at baseline, sex, socioeconomic status based on the Townsend deprivation index, ethnicity, BMI, corticosteroid use, and comorbidities (cardiovascular diseases, cancers, diabetes, chronic respiratory disease, liver disease, end-stage renal disease, immune disorders/HIV, and hypertension)                                                       | HR                     |
| Brandenburg et al. (2021) [37]<br>Canada | Cross-sectional          | Participants responses to an online survey | July 2020 to October 2020 | -                 | 263 (57%) / NR              | PA participation was assessed using the modified physical activity rating questionnaire | Hospitalisation and severe COVID-19 | Infections (n=263)<br>Hospitalisations (n=28)<br>Severe COVID-19 (n=123) | Age, sex, relationship status, ethnic origin, education, household income, smoking, alcohol consumption, BMI, presence of physician-diagnosed COVID-19 comorbidities (including diabetes, asthma, chronic obstructive pulmonary disease, renal disease, hypertension, cardiovascular disease, and pregnancy), and time between recovery from COVID-19 and | OR                     |

|                                          |                          |                                            |                                                               |    |                        |                                                                    |                                                 |                                                                                          |                                                                                                                                                                                       |    |
|------------------------------------------|--------------------------|--------------------------------------------|---------------------------------------------------------------|----|------------------------|--------------------------------------------------------------------|-------------------------------------------------|------------------------------------------------------------------------------------------|---------------------------------------------------------------------------------------------------------------------------------------------------------------------------------------|----|
|                                          |                          |                                            |                                                               |    |                        |                                                                    |                                                 |                                                                                          | completion of the online survey                                                                                                                                                       |    |
| Cho et al. (2021) [31]<br>South Korea    | Case-control             | Korean National Health Insurance database  | January 2020 to July 2020 (cases), and [2014-2017] (controls) | -  | 132,060 (NR) / 50.7    | Questionnaire for physical activity                                | COVID-19 infection and mortality                | Infections (n=6288)<br>Deaths (n=92)                                                     | Age, sex, economic income, medical history (obesity, hypertension, diabetes mellitus, dyslipidaemia, ischaemic heart disease, and stroke), smoking status, and alcohol consumption    | OR |
| de Souza et al. (2021) [32]<br>Brazil    | Cross-sectional          | Participants responses to an online survey | June 2020 to August 2020                                      | -  | 938 (65%) / NR         | IPAQ short version, through an online questionnaire.               | Hospitalisation                                 | Hospitalisations (n=91)<br>Severe COVID-19 (n=54)                                        | Age, sex and pre-existing diseases                                                                                                                                                    | PR |
| Eklblom-Bak et al. (2021) [33]<br>Sweden | Case-control             | Health Profile Assessment database         | [1992-2020] and 2021                                          | -  | 4,283 (29.6) / 49.9    | Self-reported                                                      | Hospitalisation, severe COVID-19, and mortality | Infections (n=857)<br>Hospitalisations (n=547)<br>Severe COVID-19 (n=172) Deaths (n=138) | Sex, age, performed year, educational level, civil status, country of birth, estimated VO <sub>2</sub> max, BMI, number of chronic diseases, exercise habits, smoking, overall stress | OR |
| Hamdan et al. (2021) [38]<br>Palestine   | Cross-sectional          | Participants responses to a questionnaire  | August 2020 to December 2020                                  | -  | 300 (55%) / NR         | Physical activity was self-reported, and it was coded as yes or no | Hospitalisation                                 | Infections (n=300)<br>Hospitalisations (n=59)                                            | NR                                                                                                                                                                                    | OR |
| Hamer et al. (2020) [20]<br>UK           | Prospective cohort study | UK Biobank                                 | [2006-2010] and 2020                                          | NR | 387,109 (55.1%) / 56.2 | IPAQ                                                               | Hospitalisation                                 | Hospitalisations (n=760)                                                                 | Age, sex, education, ethnicity, diabetes, hypertension, cardiovascular disease (heart attack, angina or stroke)                                                                       | RR |
| Latorre-                                 | Cross-                   | Participants                               | May 2020                                                      | -  | 420 (52.6%) /          | IPAQ                                                               | Severe COVID-19                                 | Severe                                                                                   | Age                                                                                                                                                                                   | RR |

|                                                                               |                          |                                                           |                                                               |    |                      |                                                                                                                                                                            |                                                    |                                                                                 |                                                                                                                                                                                                                                                                                                                                                                                             |    |
|-------------------------------------------------------------------------------|--------------------------|-----------------------------------------------------------|---------------------------------------------------------------|----|----------------------|----------------------------------------------------------------------------------------------------------------------------------------------------------------------------|----------------------------------------------------|---------------------------------------------------------------------------------|---------------------------------------------------------------------------------------------------------------------------------------------------------------------------------------------------------------------------------------------------------------------------------------------------------------------------------------------------------------------------------------------|----|
| Román et al. (2021) [28]<br>Spain                                             | sectional                | responses to an online survey                             | to June 2020                                                  |    | 33.0                 |                                                                                                                                                                            |                                                    | COVID-19 (n=139)                                                                |                                                                                                                                                                                                                                                                                                                                                                                             |    |
| Lee et al. (2021) [10]<br>South Korea                                         | Prospective cohort study | National Health Insurance Service of South Korea          | January 2020 to July 2020 (cases), and [2018-2019] (controls) | NR | 76,395 (51.2%) / NR  | Questionnaire (weekly minutes of moderate and vigorous physical activity, aerobic physical activity and muscle strengthening) and then estimation of METs according to it. | COVID-19 infection, severe COVID-19, and mortality | Infections (n=2,295)<br>Severe COVID-19 (n=446)<br>Deaths (n=45)                | Age, sex, region of residence, Charlson comorbidity index, history of diabetes mellitus, tuberculosis, stroke and cardiovascular disease, BMI, systolic blood pressure, diastolic blood pressure, fasting blood glucose, serum total cholesterol, glomerular filtration rate, household income, alcoholic drinks, medication for hypertension, diabetes mellitus and cardiovascular disease | RR |
| Li-Hua et al. (2021) [34]<br>Multi-country (COVID-19 Host Genetic Initiative) | Case-control             | Genome-wide association studies                           | NR                                                            | -  | 1,019,301 (NR) / NR  | Accelerometer                                                                                                                                                              | Hospitalisation and severe COVID-19                | Infections (n=6,492)<br>Hospitalisations (n=6,492)<br>Severe COVID-19 (n=2,972) | NR                                                                                                                                                                                                                                                                                                                                                                                          | OR |
| Maltagliati et al. (2021) [29]<br>Multi-country (European                     | Prospective cohort study | Survey of Health, Ageing and Retirement in Europe (SHARE) | [2004-2017] and [2020]                                        | NR | 3,139 (56.2%) / 69.3 | Self-reported                                                                                                                                                              | Hospitalisation                                    | Infections (n=266),<br>Hospitalisations (n=66)                                  | Age, height, sex, BMI, cardiovascular disease, diabetes, cancer, chronic kidney disease, rheumatoid arthritis, respiratory disease and weak                                                                                                                                                                                                                                                 | OR |



|                                              |                                   |                                                                        |                                                                |     |                       |                                                                                            |                                                 |                                                                                                     |                                                                                                                                                                                                                                                                                                                                                                                     |    |
|----------------------------------------------|-----------------------------------|------------------------------------------------------------------------|----------------------------------------------------------------|-----|-----------------------|--------------------------------------------------------------------------------------------|-------------------------------------------------|-----------------------------------------------------------------------------------------------------|-------------------------------------------------------------------------------------------------------------------------------------------------------------------------------------------------------------------------------------------------------------------------------------------------------------------------------------------------------------------------------------|----|
| adults)                                      |                                   |                                                                        |                                                                |     |                       |                                                                                            |                                                 |                                                                                                     | muscle strength                                                                                                                                                                                                                                                                                                                                                                     |    |
| Rowlands et al. (2021) [35]<br>UK            | Prospective cohort study          | UK Biobank                                                             | [2013-2015] and linked with data from March 2020 to March 2021 | 5.6 | 82,253 (55%) / 68.0   | Accelerometer                                                                              | Severe COVID-19                                 | Infections (n=2,388)<br>Hospitalisations (n=434)<br>Severe COVID-19 (n=434)                         | Age, follow-up time, season of accelerometer wear, sex, ethnicity, Townsend score, employment status, cardiovascular disease or cancer diagnosis before accelerometer baseline                                                                                                                                                                                                      | OR |
| Sallis et al. (2021) [21]<br>USA             | Retrospective cohort study        | Electronic health records of Kaiser Permanente South California (KPSC) | 2018-2020                                                      | 2   | 48,440 (61.9%) / 47.5 | Self-reported                                                                              | Hospitalisation, severe COVID-19, and mortality | Infections (n=48,440)<br>Hospitalisations (n=4,236)<br>Severe COVID-19 (n=1,199)<br>Deaths (n=771)  | Age, sex, race, underlying medical conditions (history of cancer, chronic kidney disease, chronic obstructive pulmonary disease, cardiovascular disease, history of organ transplant), obesity, class 3 obesity, pregnancy, current smoking status, diabetes, history of hypertension and an emergency department visit or hospitalisation in the 6 months prior to COVID diagnosis | OR |
| Steenkamp et al. (2021) [26]<br>South Africa | Retrospective observational study | Discovery Health and Vitality client data (DHMS)                       | 2018-2020                                                      | 2   | 65,361 (48.2%) / 41.0 | Directly measured recording of physical activity through the Vitality programme (via smart | Hospitalisation, severe COVID-19, and mortality | Infections (n=65,361)<br>Hospitalisations (n=7,255)<br>Severe COVID-19 (n=1,569)<br>Deaths (n=1046) | Age, sex, comorbidities (hypertension, diabetes, ischaemic heart disease, chronic lung disease, chronic renal failure and HIV), and patient complexity                                                                                                                                                                                                                              | RR |

|                                                                                                                                                                                                                                                                                                                                                                                                                        |                          |                                                                              |                                 |    |                        |                                                                              |                                  |                                                                         |                                                                                                                                        |    |
|------------------------------------------------------------------------------------------------------------------------------------------------------------------------------------------------------------------------------------------------------------------------------------------------------------------------------------------------------------------------------------------------------------------------|--------------------------|------------------------------------------------------------------------------|---------------------------------|----|------------------------|------------------------------------------------------------------------------|----------------------------------|-------------------------------------------------------------------------|----------------------------------------------------------------------------------------------------------------------------------------|----|
|                                                                                                                                                                                                                                                                                                                                                                                                                        |                          |                                                                              |                                 |    |                        | devices, clocked gym attendance or recorded mass sports event participation) |                                  |                                                                         |                                                                                                                                        |    |
| Tavakol et al. (2021) [39]<br>Iran                                                                                                                                                                                                                                                                                                                                                                                     | Cross-sectional          | Patients who visited the respiratory emergency department of a single centre | March 2020 to April 2020        | -  | 206 (57.8%) / 40.9     | GPAQ                                                                         | Severe COVID-19                  | Infections (n=206)<br>Hospitalisations (n=24)<br>Severe COVID-19 (n=24) | Age                                                                                                                                    | OR |
| Zhang et al. (2021) [36]<br>UK                                                                                                                                                                                                                                                                                                                                                                                         | Prospective cohort study | UK Biobank                                                                   | March 2020 to June 2020 (cases) | NR | 502,504 (44.8%) / 68.6 | Acceleration vector magnitude PA                                             | COVID-19 infection and mortality | Infections (n=1,746)<br>Hospitalisations (n=1,020)<br>Deaths (n=399)    | Age, sex, waist circumference, hip circumference, BMI, smoking status, exposure to smoking at home and exposure to smoking out of home | OR |
| Abbreviations: BMI, Body mass index; CRF, cardiorespiratory fitness; GPAQ, Global Physical Activity Questionnaire; HIV, Human immunodeficiency virus; HR, hazard ratio; ICU, Intensive care unit; IPAQ, International Physical Activity Questionnaire; METS, Metabolic equivalent of task; MVPA, Moderate-to-vigorous physical activity; NR, not reported; OR, odds ratio; PA, physical activity; PR, prevalence rate. |                          |                                                                              |                                 |    |                        |                                                                              |                                  |                                                                         |                                                                                                                                        |    |

**Online supplemental eTable 2.** Results of the NIH Quality Assessment Tool for Observational Cohort and Cross-Sectional Studies and the Quality Assessment of Case-Control Studies.

| Study                                                                                                                          | 1 | 2 | 3 | 4 | 5  | 6 | 7 | 8  | 9 | 10 | 11 | 12 | 13 | 14 | Total score |
|--------------------------------------------------------------------------------------------------------------------------------|---|---|---|---|----|---|---|----|---|----|----|----|----|----|-------------|
| Ahmadi et al. (2021)                                                                                                           | ✓ | ✓ | ✓ | ✓ | NR | ✓ | ✓ | ✓  | ✓ | ×  | ✓  | NR | ✓  | ✓  | 11/14       |
| Brandenburg et al. (2021)                                                                                                      | ✓ | ✓ | ✓ | ✓ | NR | ✓ | ✓ | ✓  | ✓ | ×  | ✓  | NR | ✓  | ✓  | 11/14       |
| Cho et al. (2021) *                                                                                                            | ✓ | ✓ | ✓ | ✓ | ✓  | ✓ | ✓ | NR | ✓ | ✓  | NR | ✓  |    |    | 11/12       |
| de Souza et al. (2021)                                                                                                         | ✓ | ✓ | ✓ | ✓ | NR | ✓ | ✓ | ✓  | ✓ | ×  | ✓  | NR | NA | ✓  | 10/14       |
| Ekblom-Bak et al. (2021) *                                                                                                     | ✓ | ✓ | ✓ | ✓ | ✓  | ✓ | ✓ | NR | ✓ | ✓  | NR | ✓  |    |    | 10/12       |
| Hamdan et al. (2021)                                                                                                           | ✓ | ✓ | ✓ | ✓ | NR | ✓ | ✓ | ×  | × | ×  | ✓  | NR | NA | ×  | 7/14        |
| Hamer et al. (2020)                                                                                                            | ✓ | ✓ | ✓ | ✓ | NR | ✓ | ✓ | ✓  | ✓ | ×  | ✓  | NR | ✓  | ✓  | 11/14       |
| Latorre-Román et al. (2021)                                                                                                    | ✓ | ✓ | ✓ | ✓ | NR | ✓ | ✓ | ✓  | ✓ | ×  | ✓  | NR | NA | ✓  | 10/14       |
| Lee et al. (2021)                                                                                                              | ✓ | ✓ | ✓ | ✓ | NR | ✓ | ✓ | ✓  | ✓ | ×  | ✓  | NR | ✓  | ✓  | 11/14       |
| Li-Hua et al. (2021) *                                                                                                         | ✓ | ✓ | ✓ | ✓ | ✓  | ✓ | ✓ | NR | ✓ | NR | NR | NR |    |    | 8/12        |
| Maltagliati et al. (2021)                                                                                                      | ✓ | ✓ | ✓ | ✓ | NR | ✓ | ✓ | ×  | × | ×  | ✓  | NR | ✓  | ✓  | 9/14        |
| Rowlands et al. (2021)                                                                                                         | ✓ | ✓ | ✓ | ✓ | NR | ✓ | ✓ | ✓  | ✓ | ×  | ✓  | NR | ✓  | ✓  | 11/14       |
| Sallis et al. (2021)                                                                                                           | ✓ | ✓ | ✓ | ✓ | NR | ✓ | ✓ | ✓  | ✓ | ×  | ✓  | NR | ✓  | ✓  | 11/14       |
| Steenkamp et al. (2021)                                                                                                        | ✓ | ✓ | ✓ | ✓ | NR | ✓ | ✓ | ✓  | ✓ | ×  | ✓  | NR | ✓  | ✓  | 11/14       |
| Tavakol et al. (2021)                                                                                                          | ✓ | ✓ | ✓ | ✓ | NR | ✓ | ✓ | ✓  | ✓ | ×  | ✓  | NR | NA | ✓  | 10/14       |
| Zhang et al. (2021)                                                                                                            | ✓ | ✓ | ✓ | ✓ | NR | ✓ | ✓ | ✓  | ✓ | ×  | ✓  | NR | ✓  | ✓  | 11/14       |
| ✓ indicates "yes", × indicates "no", NA indicates "not applicable", and NR indicates "not reported".<br>* Case-control studies |   |   |   |   |    |   |   |    |   |    |    |    |    |    |             |

**Online supplemental eTable 3.** Grading of Recommendations Assessment, Development and Evaluation (GRADE) assessment of overall quality of evidence.

| Physical activity and COVID-19 outcomes |                            |              |                           |                                      |               |              |             |                  |                     |
|-----------------------------------------|----------------------------|--------------|---------------------------|--------------------------------------|---------------|--------------|-------------|------------------|---------------------|
| N° of participants (studies)            | Study design               | Risk of bias | Magnitude of Effect       | Dose-response gradient               | Inconsistency | Indirectness | Imprecision | Publication bias | Quality of evidence |
| <b>SARS-CoV-2 Infection</b>             |                            |              |                           |                                      |               |              |             |                  |                     |
| 710,959 (3 studies)                     | Observational <sup>a</sup> | Low          | RR=0.89 (no large effect) | Undetected                           | No serious    | No serious   | No serious  | Detected (major) | ⊕⊕○○<br>LOW         |
| <b>COVID-19 Hospitalisation</b>         |                            |              |                           |                                      |               |              |             |                  |                     |
| 1,525,271 (9 studies)                   | Observational <sup>b</sup> | Low-Moderate | RR=0.64 (no large effect) | Undetected                           | No serious    | No serious   | No serious  | Detected (minor) | ⊕⊕○○<br>LOW         |
| <b>Severe COVID-19 illness</b>          |                            |              |                           |                                      |               |              |             |                  |                     |
| 1,209,966 (7 studies)                   | Observational <sup>c</sup> | Low          | RR=0.66 (no large effect) | Nonlinear dose-response relationship | No serious    | No serious   | No serious  | Detected (major) | ⊕⊕⊕○<br>MODERATE    |
| <b>Mortality due to COVID-19</b>        |                            |              |                           |                                      |               |              |             |                  |                     |
| 824,760 (6 studies)                     | Observational <sup>d</sup> | Low          | RR=0.57 (no large effect) | Nonlinear dose-response relationship | No serious    | No serious   | No serious  | Detected (major) | ⊕⊕⊕○<br>MODERATE    |

RR, relative risk.

**Explanations:**

- Study designs included 1 cross-sectional study and 2 prospective cohort studies
- Study designs included 4 cross-sectional studies, 1 case-control study, 2 prospective cohort studies and 2 retrospective cohort studies
- Study designs included 2 cross-sectional studies, 1 case-control study, 2 prospective cohort studies and 2 retrospective cohort studies
- Study designs included 1 case-control study, 3 prospective cohort studies and 2 retrospective cohort studies

**Online supplemental eFigure 1.** Doi plot for hospitalisation. Relative Risk was transferred to natural logarithm form.

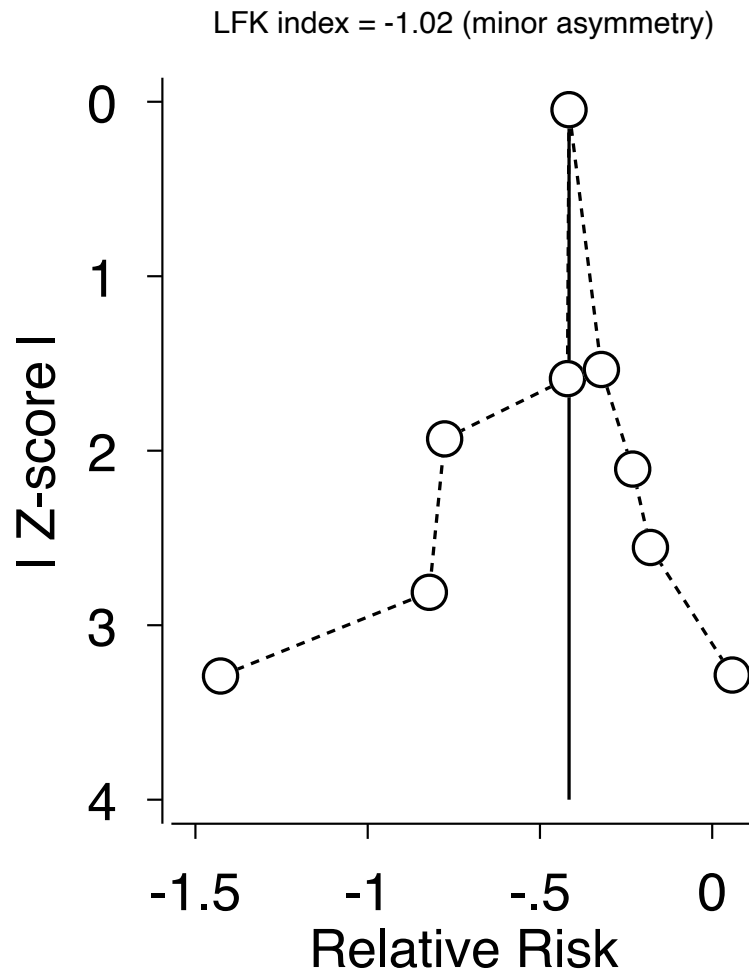

**Online supplemental eFigure 2.** Doi plot for COVID-19 infection. Relative Risk was transferred to natural logarithm form.

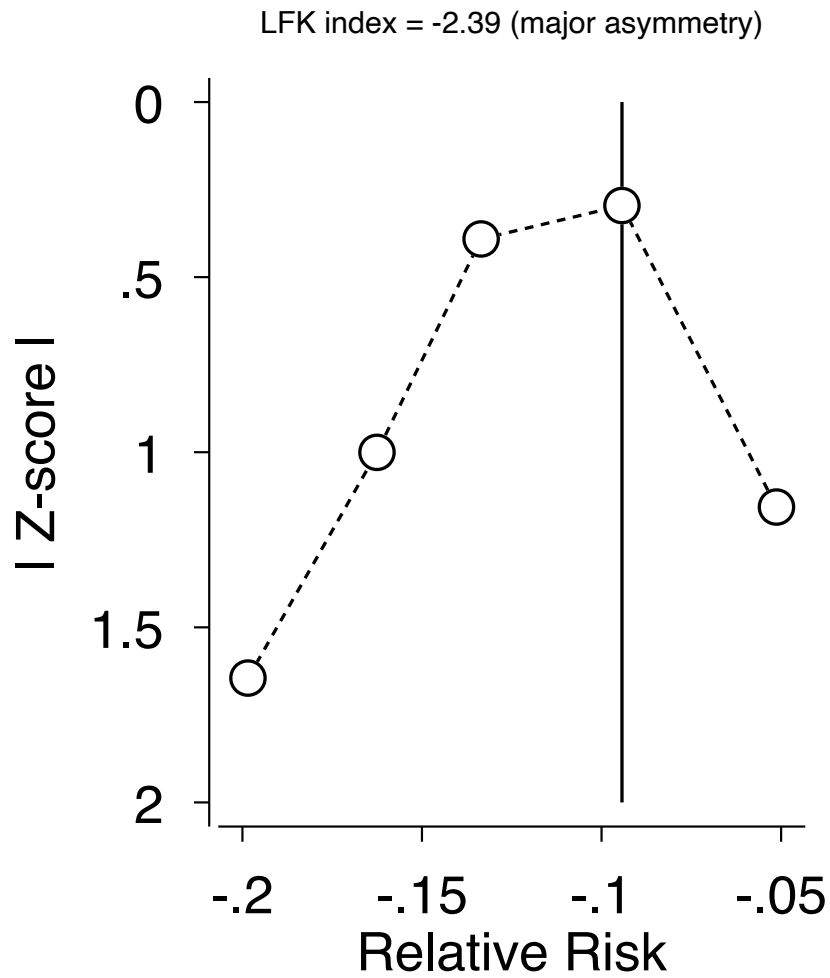

**Online supplemental eFigure 3.** Doi plot for severe COVID-19 illness. Relative Risk was transferred to natural logarithm form.

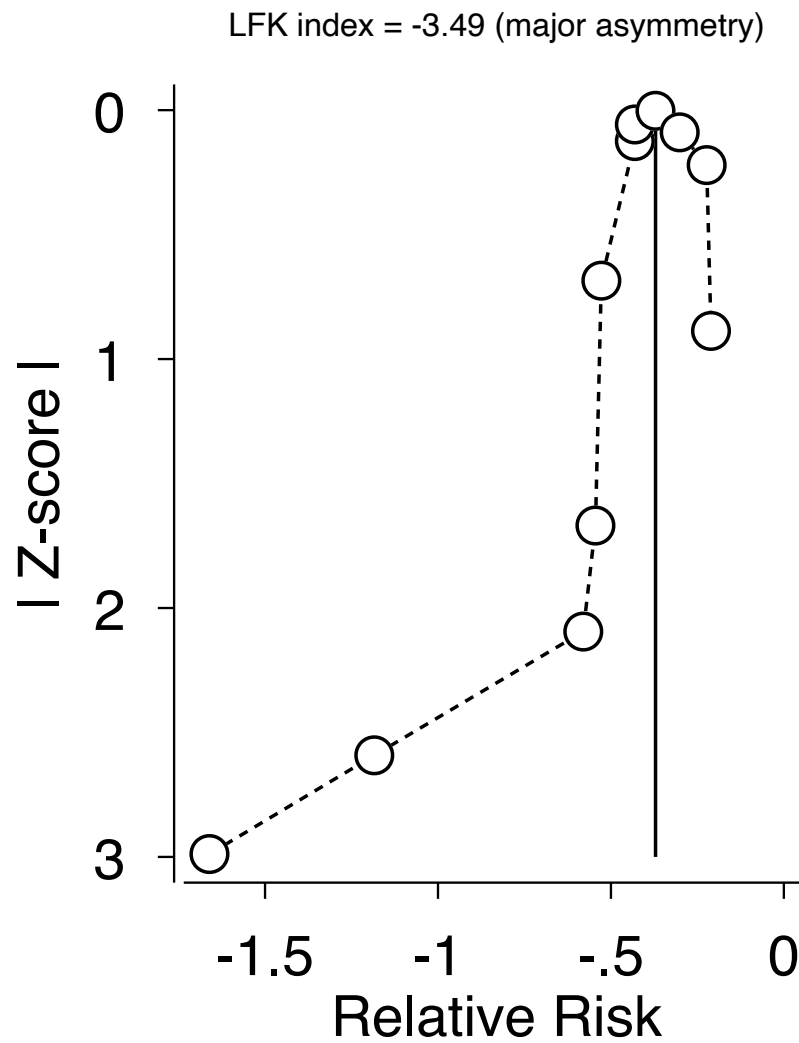

**Online supplemental eFigure 4.** Doi plot for death due to COVID-19. Relative Risk was transferred to natural logarithm form.

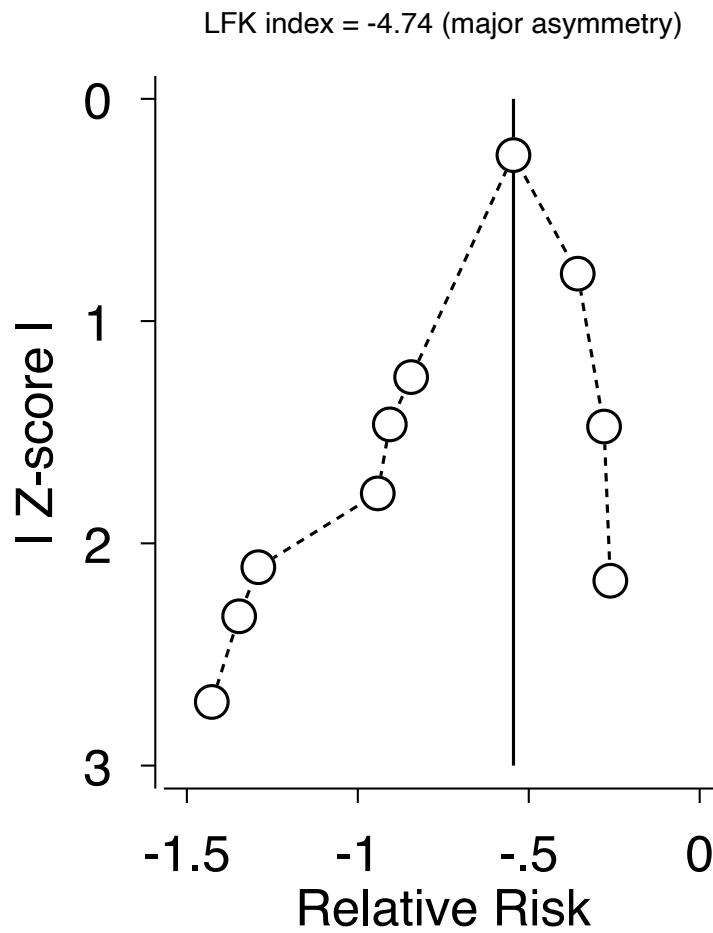



**Online supplemental eFigure 5.** Sensitivity analyses once each study was excluded for COVID-19 infection.

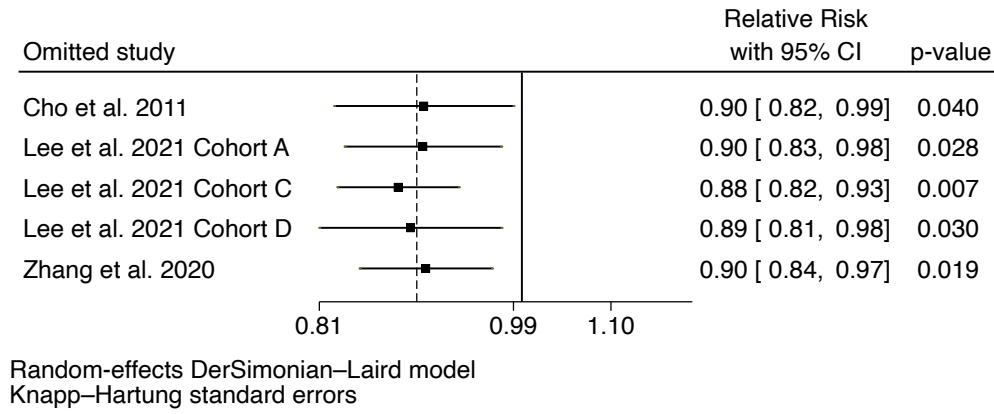

**Online supplemental eFigure 6.** Sensitivity analyses once each study was excluded for hospitalization due to COVID-19.

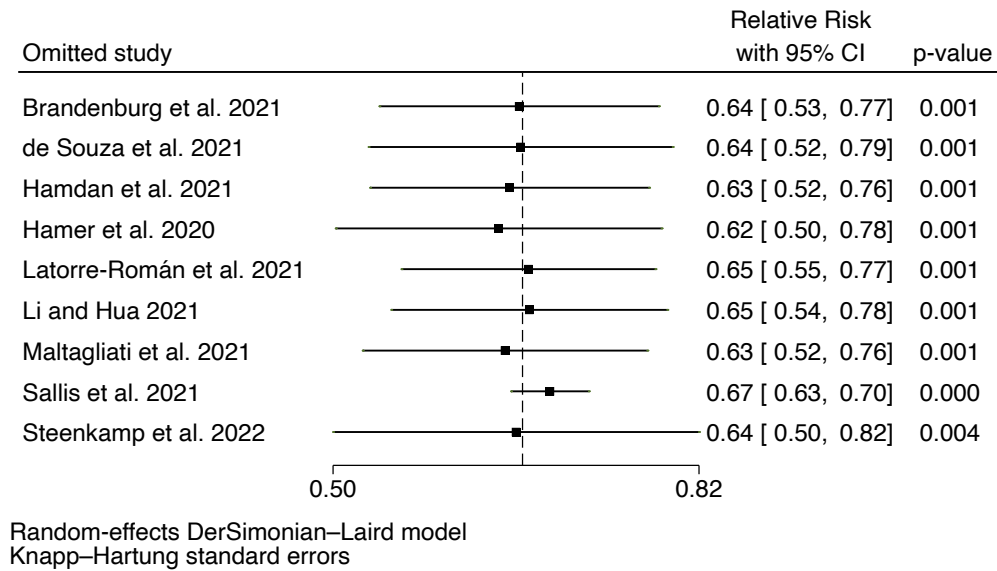

**Online supplemental eFigure 7.** Sensitivity analyses once each study was excluded for severe COVID-19 illness.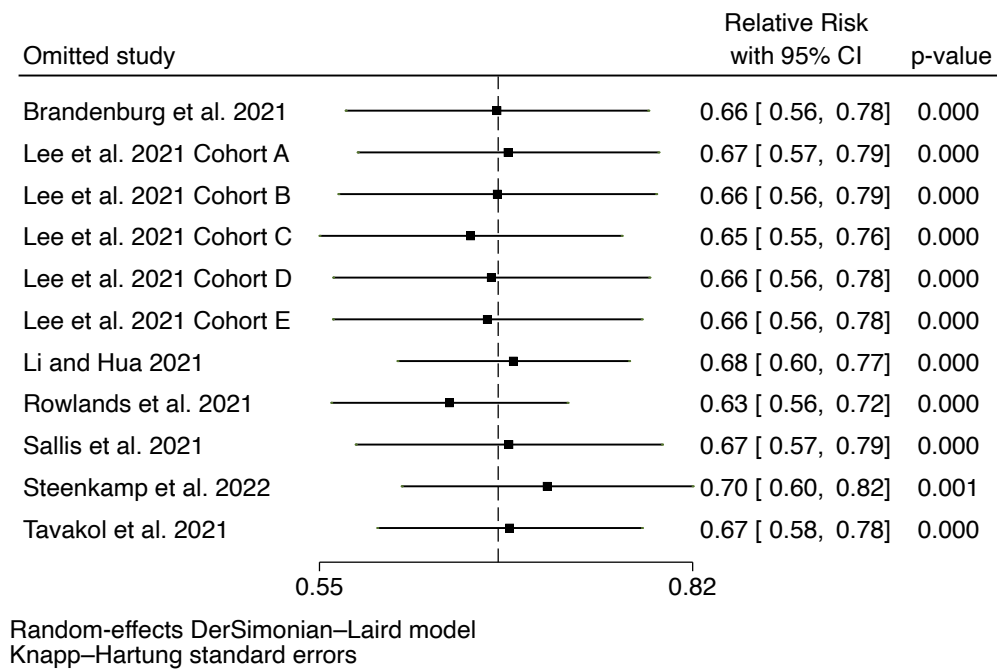

**Online supplemental eFigure 8.** Sensitivity analyses once each study was excluded for death due to COVID-19.

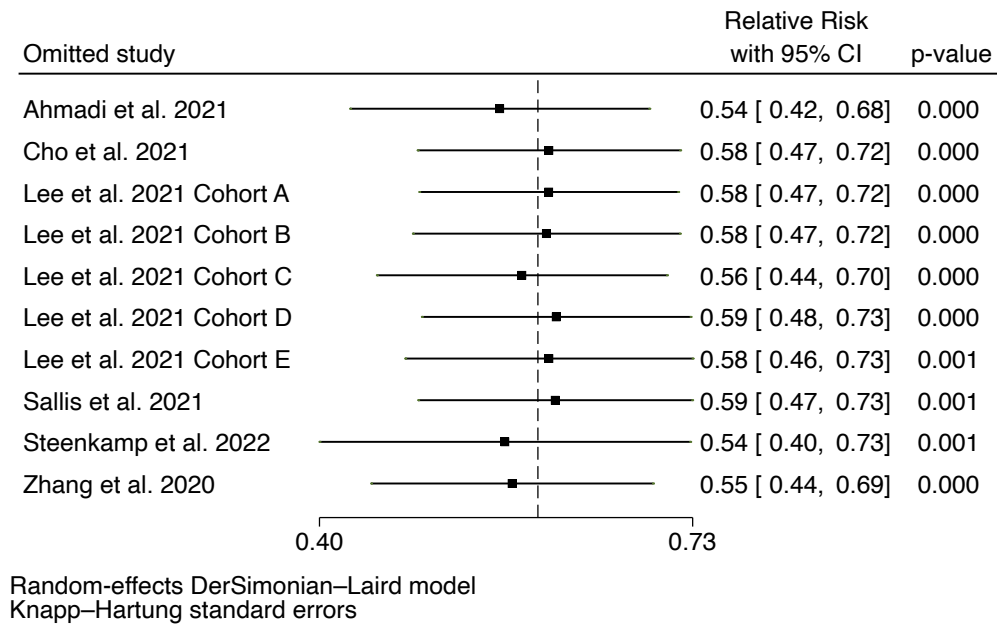

**Online supplemental eTable 4.** Subgroup analysis according to design, physical activity assessment, and measure outcome.

|                                  | N | RR   | 95% CI       | p      | I <sup>2</sup> |
|----------------------------------|---|------|--------------|--------|----------------|
| SARS-CoV-2 infection             |   |      |              |        |                |
| Cross-sectional and case-control | 1 | -    | -            | -      | -              |
| Prospective and retrospective    | 4 | 0.90 | 0.81 to 0.99 | 0.044  | 0              |
| Objective physical activity      | 0 | -    | -            | -      | -              |
| Subjective physical activity     | 5 | 0.89 | 0.83 to 0.96 | 0.014  | 0              |
| Only studies with Relative Risk  | 3 | 0.91 | 0.80 to 1.06 | 0.115  | 0              |
| Hospitalisation                  |   |      |              |        |                |
| Cross-sectional and case-control | 5 | 0.66 | 0.44 to 0.99 | 0.048  | 0              |
| Prospective and retrospective    | 4 | 0.64 | 0.54 to 0.76 | 0.026  | 74.4           |
| Objective physical activity      | 2 | -    | -            | -      | -              |
| Subjective physical activity     | 7 | 0.65 | 0.50 to 0.85 | 0.016  | 58.3           |
| Only studies with Relative Risk  | 5 | 0.66 | 0.62 to 0.71 | <0.001 | 0              |
| Severe COVID-19 illness          |   |      |              |        |                |
| Cross-sectional and case-control | 2 | -    | -            | -      | -              |
| Prospective and retrospective    | 9 | 0.68 | 0.59 to 0.80 | <0.001 | 52.5           |
| Objective physical activity      | 3 | 0.65 | 0.24 to 1.75 | 0.200  | 88.5           |
| Subjective physical activity     | 8 | 0.68 | 0.57 to 0.78 | 0.001  | 0              |
| Only studies with Relative Risk  | 9 | 0.64 | 0.55 to 0.75 | <0.001 | 17.39          |
| Death due to COVID-19            |   |      |              |        |                |
| Cross-sectional and case-control | 1 | -    | -            | -      | -              |
| Prospective and retrospective    | 8 | 0.56 | 0.45 to 0.70 | 0.002  | 24.7           |
| Objective physical activity      | 2 | -    | -            | -      | -              |
| Subjective physical activity     | 7 | 0.55 | 0.35 to 0.69 | 0.007  | 35.4           |
| Only studies with Relative Risk  | 8 | 0.61 | 0.47 to 0.80 | 0.003  | 61.30          |
